# Supplementary material for: Anti-tumor effect of pH-sensitive drug-loaded nanoparticles optimized via an integrated computational/experimental approach
Source: Royal Society of Chemistry journal article supplement (doi:10.1039/d3nr06414j), 2024-01-01
Supplement: d3nr06414j1.pdf [file d3nr06414j1.pdf]

**SUPPLEMENTARY MATERIAL FOR:**

**Anti-tumor effect of pH-sensitive drug-loaded nanoparticles optimized via an integrated computational/experimental approach**

Hunter A. Miller<sup>a,+</sup>, Yapei Zhang<sup>b,c,+</sup>, Bryan Ronain Smith<sup>b,c,\*</sup>, Hermann B. Frieboes<sup>a,d,e,f,\*</sup>

<sup>a</sup> Department of Bioengineering, University of Louisville, Louisville, KY, USA

<sup>b</sup> Department of Biomedical Engineering, Michigan State University, East Lansing, MI, USA

<sup>c</sup> Institute for Quantitative Health Science and Engineering, Michigan State University, East Lansing, MI, USA

<sup>d</sup> Department of Pharmacology and Toxicology, University of Louisville, Louisville, KY, USA

<sup>e</sup> James Graham Brown Cancer Center, University of Louisville, Louisville, KY, USA

<sup>f</sup> Center for Predictive Medicine, University of Louisville, Louisville, KY, USA

+ Equal contribution

**\* Co-corresponding authors:**

Hermann B. Frieboes: [hbfrie01@louisville.edu](mailto:hbfrie01@louisville.edu)

Bryan R. Smith: [smit2901@msu.edu](mailto:smit2901@msu.edu)

## SUPPLEMENTARY TABLES

**Supplementary Table 1.** Measurements of DOX release from SPNCD in PBS at different values of pH.

| Time (h) | Drug release (%) |      |      |        |      |      |        |      |      |
|----------|------------------|------|------|--------|------|------|--------|------|------|
|          | pH 7.4           |      |      | pH 7.1 |      |      | pH 6.8 |      |      |
| 1        | 0.11             | 0.13 | 0.11 | 0      | 0.11 | 0.15 | 3.7    | 4.9  | 5.2  |
| 2        | 0.11             | 0.14 | 0.15 | 0      | 0.12 | 0.15 | 8.7    | 10.2 | 9.0  |
| 5        | 0.15             | 0.17 | 0.17 | 1.3    | 1.2  | 1.7  | 15.9   | 17.2 | 19.5 |
| 24       | 0.18             | 0.22 | 0.18 | 1.8    | 1.7  | 1.9  | 30.3   | 35.7 | 36.8 |
| 48       | 0.23             | 0.25 | 0.19 | 2.5    | 2.7  | 3.7  | 38.7   | 44.1 | 46.4 |
| Time (h) | pH 6.5           |      |      | pH 6.0 |      |      | pH 5.5 |      |      |
| 1        | 12.4             | 13.0 | 11.9 | 6.7    | 7.9  | 7.2  | 12.5   | 14.3 | 11.9 |
| 2        | 15.6             | 15.9 | 15.5 | 13.1   | 13.6 | 13.2 | 15.8   | 17.2 | 16.3 |
| 5        | 25.5             | 24.9 | 25.8 | 29.3   | 28.7 | 29.2 | 31.2   | 33.5 | 33.1 |
| 24       | 51.5             | 55.3 | 52.5 | 58.9   | 60.3 | 59.5 | 65.8   | 64.9 | 65.3 |
| 48       | 62.4             | 67.7 | 61.8 | 69.1   | 69.7 | 70.2 | 73.7   | 77.2 | 73.3 |

**Supplementary Table 2.** Computational model parameters for best-fit equation (1) used to fit SPNCD DOX release at specific pH values (corresponding to those experimentally observed in **Figure 1**). Each SPNCD type represents a different DOX release rate profile (as defined in **Supplementary Figure 6**), where Rate 1 is slowest, Rate 2 is slower, Rate 3 is the experimental baseline (**Figure 1D**), Rate 4 is faster, and Rate 5 displays the fastest DOX release.  $N$  is cumulative fraction of drug remaining,  $t$  is time and  $T_A$  is non-dimensionalized tumor acidity based on the lactate concentration. Parameter  $n_1$  represents the fraction of initial (non-dimensionalized to 1) drug concentration, while  $n_2$  and  $n_3$  represent drug fractions in SPNCD after 24 h under physiological pH and lysosomal pH conditions, respectively.

$$N = [n_1 - (n_2 - T_A(n_2 - n_3))]e^{-(\alpha + \beta T_A)t} + (n_2 - T_A(n_2 - n_3)) - \gamma t(1 + (1 - T_A))^\varepsilon$$

| pH  | Parameter                             |         |         |          |         |          |               |
|-----|---------------------------------------|---------|---------|----------|---------|----------|---------------|
|     | $n_1$                                 | $n_2$   | $n_3$   | $\alpha$ | $\beta$ | $\gamma$ | $\varepsilon$ |
|     | <b>Rate 1</b>                         |         |         |          |         |          |               |
| 5.5 | 1.01036                               | 0.00000 | 0.68975 | 0.00000  | 0.13951 | 0.00132  | 0.00000       |
| 6.0 | 0.98768                               | 0.20404 | 1.87712 | 0.11732  | 0.00000 | 0.00053  | 1.71816       |
| 6.5 | 1.00935                               | 0.79234 | 0.85908 | 0.16969  | 0.42954 | 0.00100  | 1.28862       |
| 6.8 | 0.98390                               | 0.77618 | 3.43632 | 0.02167  | 2.90830 | 0.00150  | 0.00000       |
| 7.1 | 0.98965                               | 1.28862 | 1.28862 | 0.00722  | 0.11161 | 0.00120  | 0.85908       |
| 7.4 | 1.00368                               | 0.00000 | 0.00000 | 0.00000  | 0.00000 | 0.00002  | 0.81563       |
|     | <b>Rate 2</b>                         |         |         |          |         |          |               |
| 5.5 | 0.98988                               | 0.00000 | 0.59311 | 0.00000  | 0.13228 | 0.00175  | 0.00000       |
| 6.0 | 1.00277                               | 0.72508 | 0.53632 | 0.15450  | 0.00000 | 0.00170  | 0.85908       |
| 6.5 | 0.98260                               | 0.50369 | 3.00678 | 0.05028  | 1.28862 | 0.00042  | 3.00678       |
| 6.8 | 0.98542                               | 0.84669 | 0.97419 | 0.12679  | 1.28862 | 0.00127  | 0.85908       |
| 7.1 | 1.00492                               | 0.97578 | 0.85908 | 0.01926  | 1.38803 | 0.00000  | 0.00000       |
| 7.4 | 0.99104                               | 0.24719 | 0.00000 | 0.00003  | 0.00000 | 0.00001  | 0.54379       |
|     | <b>Rate 3 (experimental baseline)</b> |         |         |          |         |          |               |
| 5.5 | 0.97549                               | 1.50840 | 0.29251 | 0.00000  | 0.09145 | 0.00093  | 0.00000       |
| 6.0 | 0.99074                               | 0.00000 | 1.13002 | 0.01962  | 0.21150 | 0.00094  | 0.00000       |
| 6.5 | 0.98885                               | 0.57895 | 0.90504 | 0.04469  | 1.81008 | 0.00185  | 1.50840       |
| 6.8 | 0.98975                               | 0.77177 | 0.30168 | 0.00241  | 3.19444 | 0.00047  | 2.71512       |
| 7.1 | 0.98975                               | 1.23651 | 0.30168 | 0.00241  | 0.13896 | 0.00134  | 0.30168       |
| 7.4 | 1.00772                               | 0.00000 | 0.00000 | 0.00000  | 0.00000 | 0.00002  | 0.71827       |
|     | <b>Rate 4</b>                         |         |         |          |         |          |               |
| 5.5 | 0.98443                               | 0.00000 | 0.20527 | 0.05614  | 0.23972 | 0.00143  | 0.00000       |
| 6.0 | 0.98833                               | 0.00000 | 0.99640 | 0.00000  | 0.91146 | 0.00085  | 1.28862       |
| 6.5 | 0.98828                               | 0.44643 | 0.00000 | 0.37980  | 0.99318 | 0.00329  | 0.00000       |
| 6.8 | 1.00318                               | 0.64430 | 0.50223 | 0.27604  | 3.86586 | 0.00042  | 2.14770       |
| 7.1 | 0.98893                               | 0.93753 | 3.43632 | 0.01445  | 0.61190 | 0.00000  | 0.00000       |
| 7.4 | 1.00167                               | 0.00000 | 0.00000 | 0.00000  | 0.00000 | 0.00002  | 0.94556       |
|     | <b>Rate 5</b>                         |         |         |          |         |          |               |
| 5.5 | 0.98448                               | 0.71509 | 0.04338 | 0.04043  | 0.22665 | 0.00000  | 0.00000       |
| 6.0 | 0.98591                               | 0.31285 | 0.02026 | 0.03919  | 0.78125 | 0.00049  | 2.57724       |
| 6.5 | 0.98936                               | 0.08409 | 2.92794 | 0.38281  | 0.95346 | 0.00197  | 0.98630       |
| 6.8 | 1.00919                               | 0.63263 | 0.00000 | 0.34278  | 3.00678 | 0.00176  | 0.42954       |
| 7.1 | 0.98651                               | 0.89169 | 3.86586 | 0.00241  | 0.25692 | 0.00000  | 0.00000       |
| 7.4 | 1.00167                               | 0.00000 | 0.00000 | 0.00000  | 0.00000 | 0.00002  | 0.94556       |

## SUPPLEMENTARY FIGURES

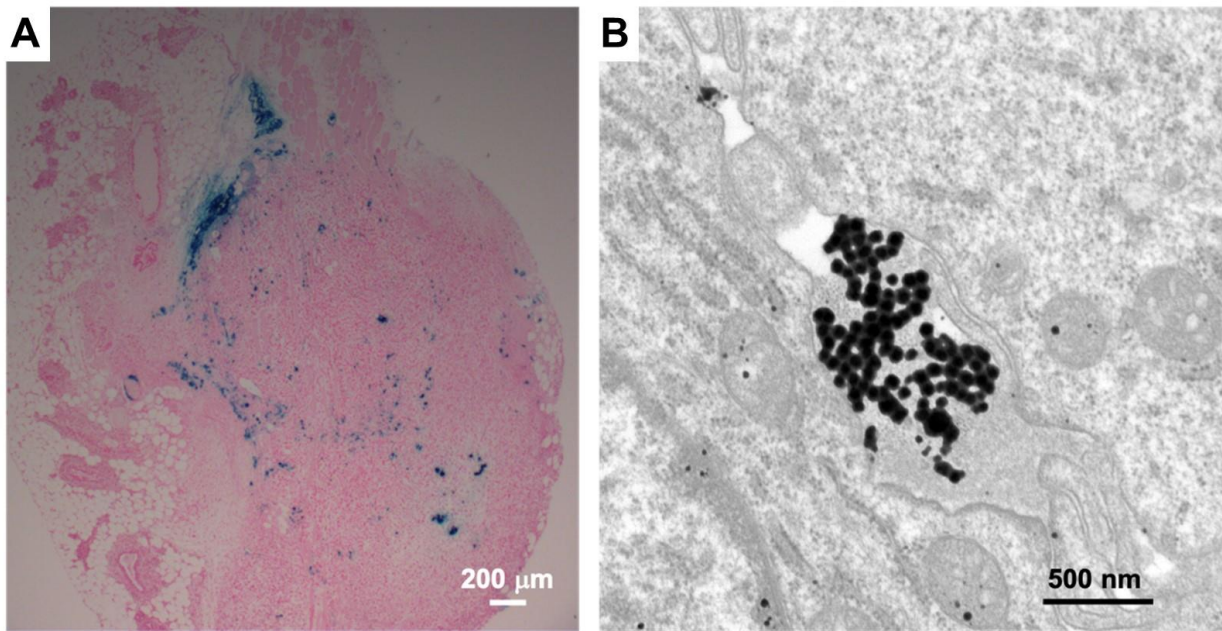

**Supplementary Figure 1. Evaluation of SPNCD distribution and degradation in tumor tissue.** (A) Representative tumor tissue slice (pink) stained with Prussian blue shows SPNCD distribution after intra-tumoral injection in mice. (B) Transmission electron microscopy (TEM) image of tumor slice shows degradation of SPNCD (black).

| Time (h) | fluorescence | ID (%) |
|----------|--------------|--------|
| 0        | 9613800      | 100.00 |
| 0.17     | 7152849.997  | 74.40  |
| 0.5      | 3953749.997  | 41.13  |
| 1        | 1858920.003  | 19.34  |
| 2        | 929580.0002  | 9.67   |
| 5        | 459019.9997  | 4.77   |
| 9        | 193850.0002  | 2.02   |
| 14       | 89020.00016  | 0.93   |
| 24       | 39809.99977  | 0.41   |

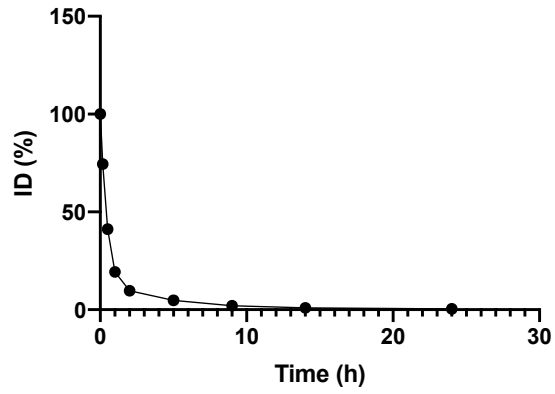

**Supplementary Figure 2. Experimental data of *in vivo* SPNCD washout as measured in blood circulation of mice.** Percent injected dose (ID %) = (Concentration of SPNCD at specific timepoint) / (initial SPNCD concentration) x 100%.

### At Start

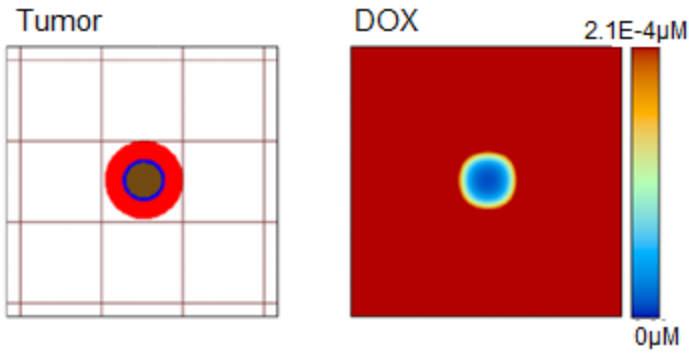

### +48 hours

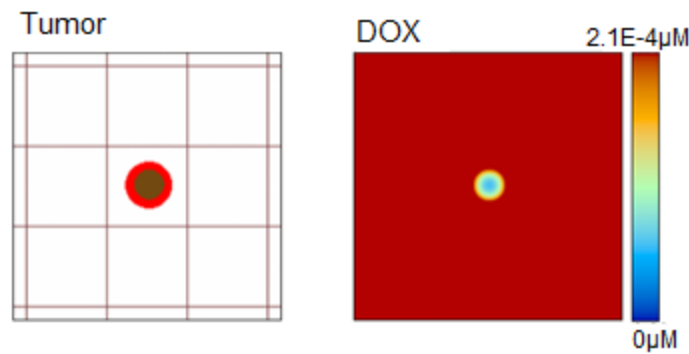

**Supplementary Figure 3. Calibration of model-simulated drug effect.** Representative images of calibration of drug effect parameter via simulation of an avascular spheroid. In the tumor panels, red denotes proliferating tissue, blue indicates hypoxic tissue, and brown indicates necrotic tissue. Rectangular lines denote capillaries acting as source of drug but without interaction with the tumor tissue. A drug effect parameter value of 5.3 was found to be equivalent to the 48-h  $\text{IC}_{50}$  experimentally measured with MDA-BM-231 breast cancer cell spheroids *in vitro* (2).

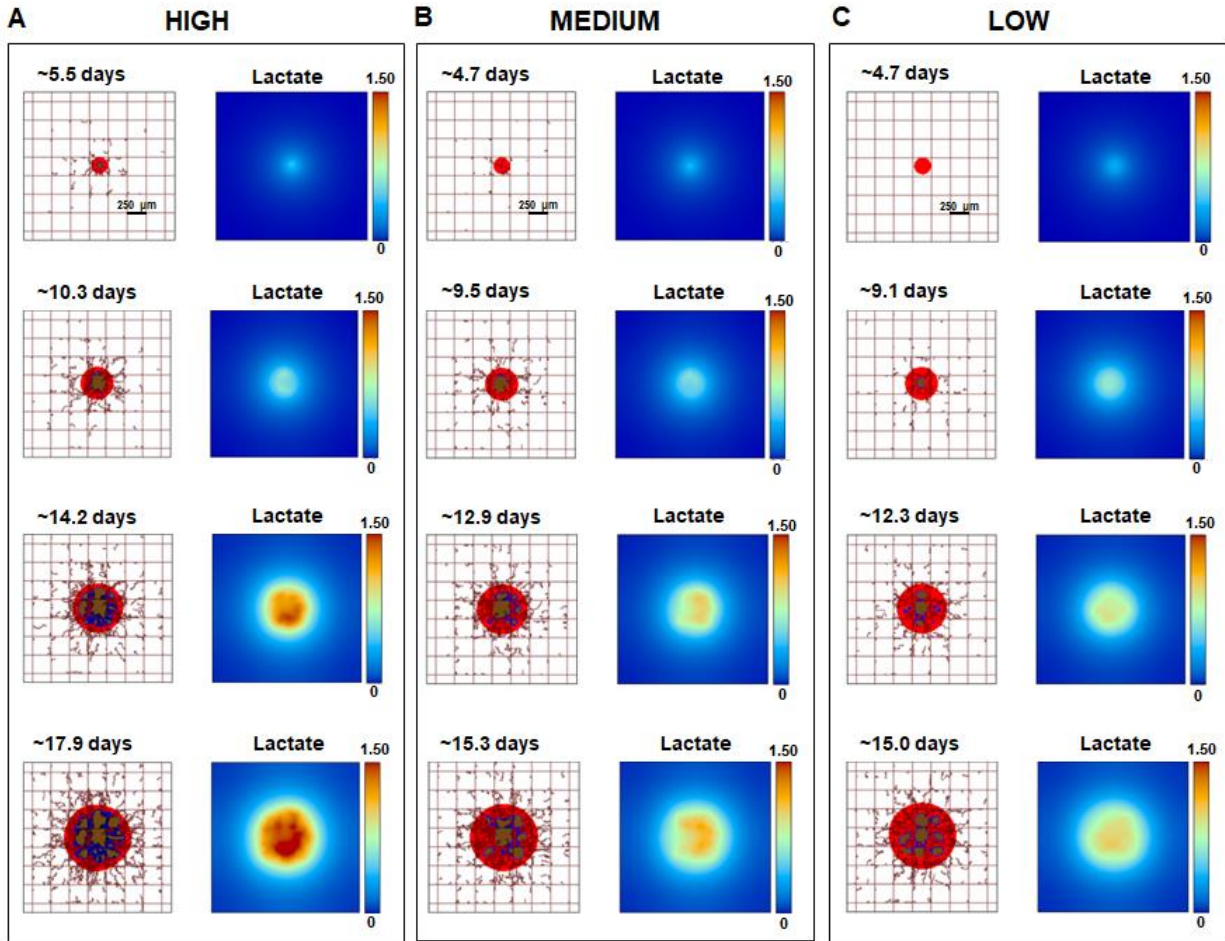

**Supplementary Figure 4. Simulation of tumor growth as a function of tissue vascular heterogeneity.** (A) HIGH, (B) MEDIUM, and (C) LOW vascular heterogeneity are shown. In the tumor panels, red denotes proliferating tissue, blue indicates hypoxic tissue, and brown indicates necrotic tissue. Pre-existing capillary grid is shown as rectangular lines along with sprouts growing due to angiogenesis. Lactate is shown in non-dimensional units. Bar: 250  $\mu\text{m}$ .

**A**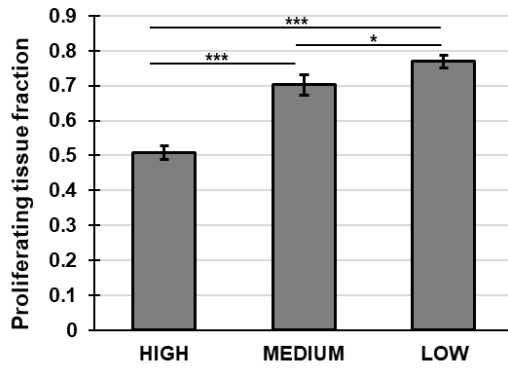**B**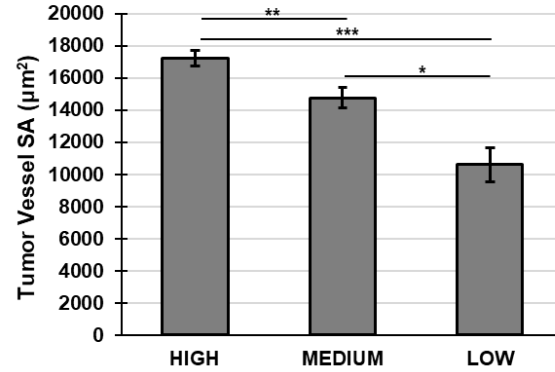

**Supplementary Figure 5. Quantification of tumor tissue characteristics based on vascular heterogeneity.** (A) Proliferating tissue fraction and (B) tumor vessel surface area (SA) were quantified at the start of therapy simulations. Error bars represent  $\pm$ SD (n=5). \*P < 0.05; \*\*P < 0.001; \*\*\*P < 0.0001.



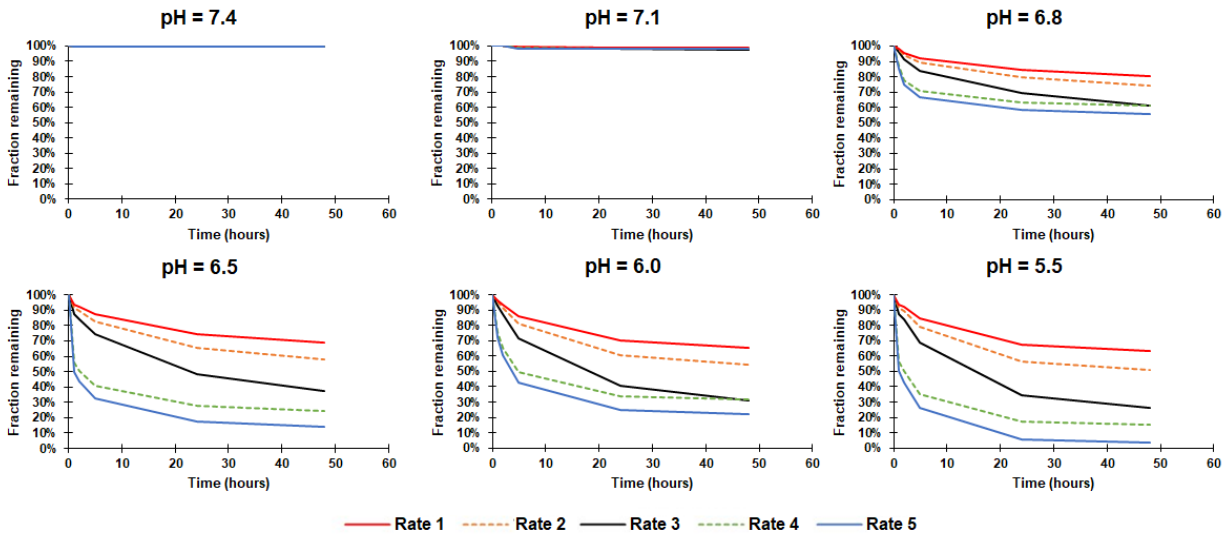

**Supplementary Figure 6. Best fit equations of DOX release profiles from SPNCD at each pH value.** Drug fraction remaining is shown over time as calculated by the values from the best-fit equation (**Supplementary Table 2**). Rate 1 is slowest release, Rate 2 is slower, Rate 3 is the experimental baseline (**Figure 1D**), Rate 4 is faster, and Rate 5 has the fastest DOX release.

## REFERENCES

1. Curtis LT, Rychahou P, Bae Y, Frieboes HB. A Computational/Experimental Assessment of Antitumor Activity of Polymer Nanoassemblies for pH-Controlled Drug Delivery to Primary and Metastatic Tumors. *Pharm Res.* 2016;33(10):2552-64.
2. Gebeyehu A, Surapaneni SK, Huang J, Mondal A, Wang VZ, Haruna NF, et al. Polysaccharide hydrogel based 3D printed tumor models for chemotherapeutic drug screening. *Sci Rep.* 2021;11(1):372.
